# Supplementary material for: In Silico Study of Cell Surface Structures of Parabacteroides distasonis Involved in Its Maintenance within the Gut Microbiota
Source: MDPI journal article supplement (doi:10.3390/ijms23169411), 2022-08-20
Supplement: s1 [file s1]

# **In Silico Study of Cell Surface Structures of *Parabacteroides distasonis* Involved in Its Maintenance within the Gut Microbiota and Its Potential Pathogenicity**

**Jordan Chamarande<sup>1</sup>, Lisiane Cunat<sup>1</sup>, Corentine Alauzet<sup>1,2</sup> and Catherine Cailliez-Grimal<sup>1,\*</sup>**

<sup>1</sup> SIMPA, Université de Lorraine, F-54000 Nancy, France

<sup>2</sup> CHRU de Nancy, Service de Microbiologie, F-54000 Nancy, France

\* Correspondence: [catherine.cailliez@univ-lorraine.fr](mailto:catherine.cailliez@univ-lorraine.fr)

A

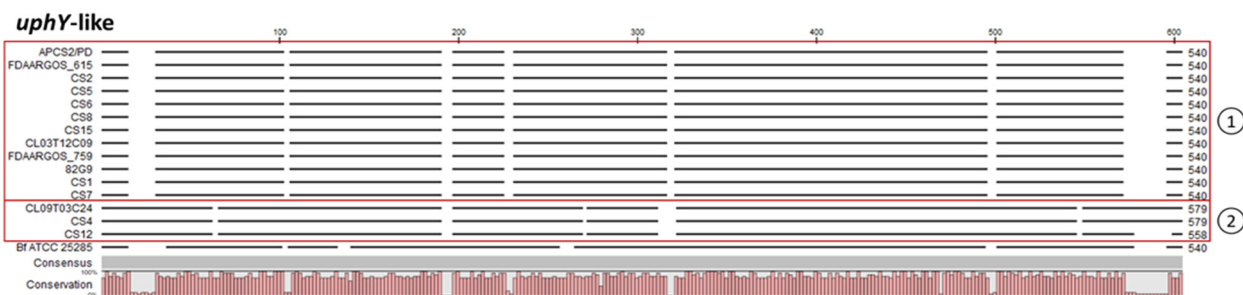

B

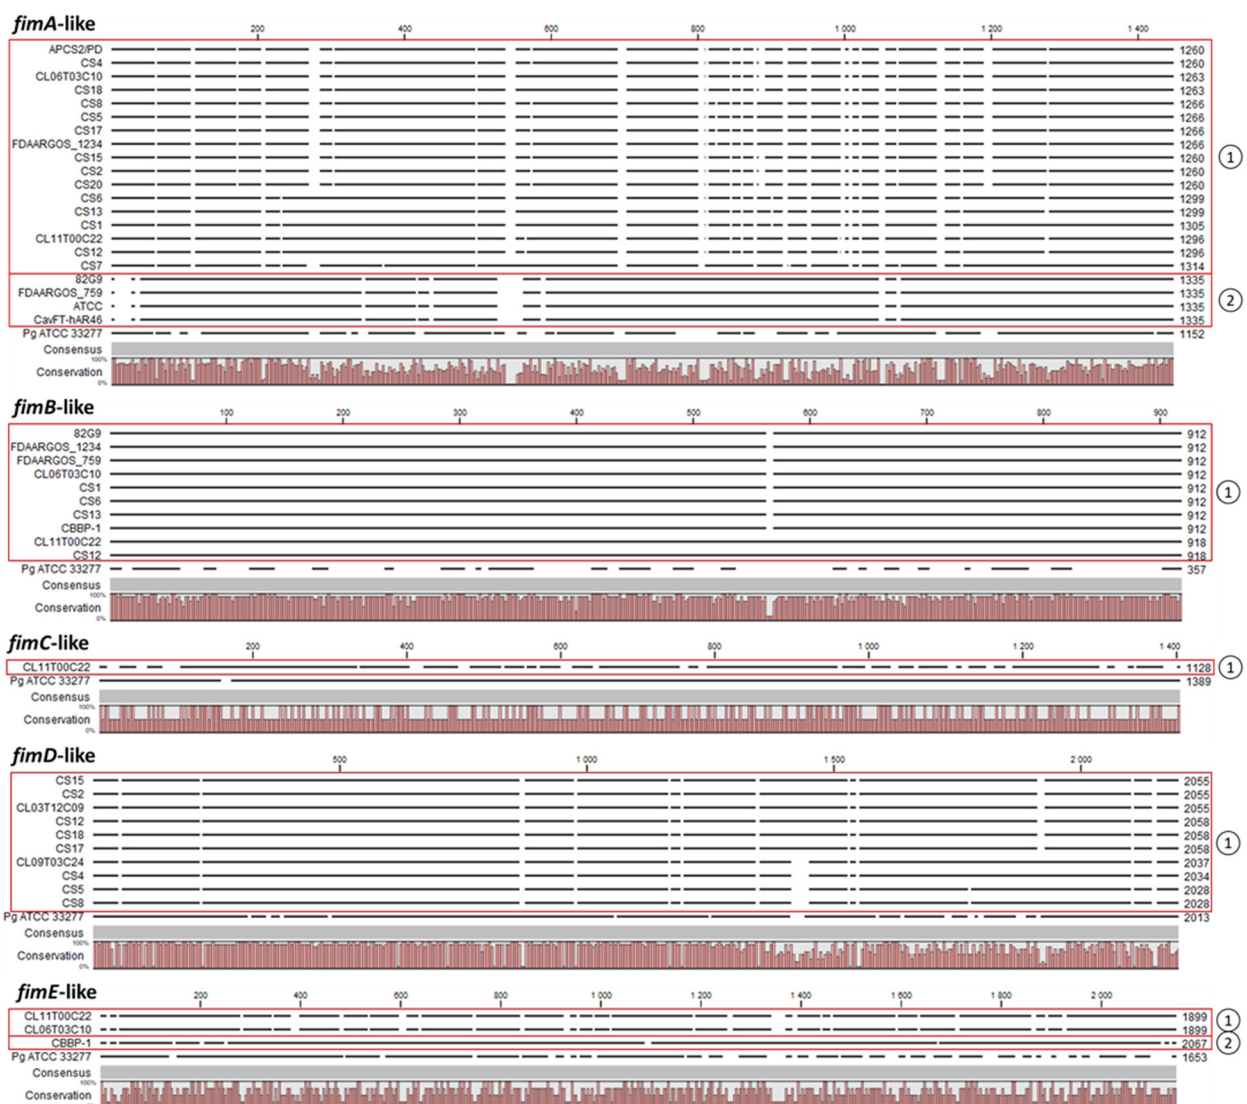

C

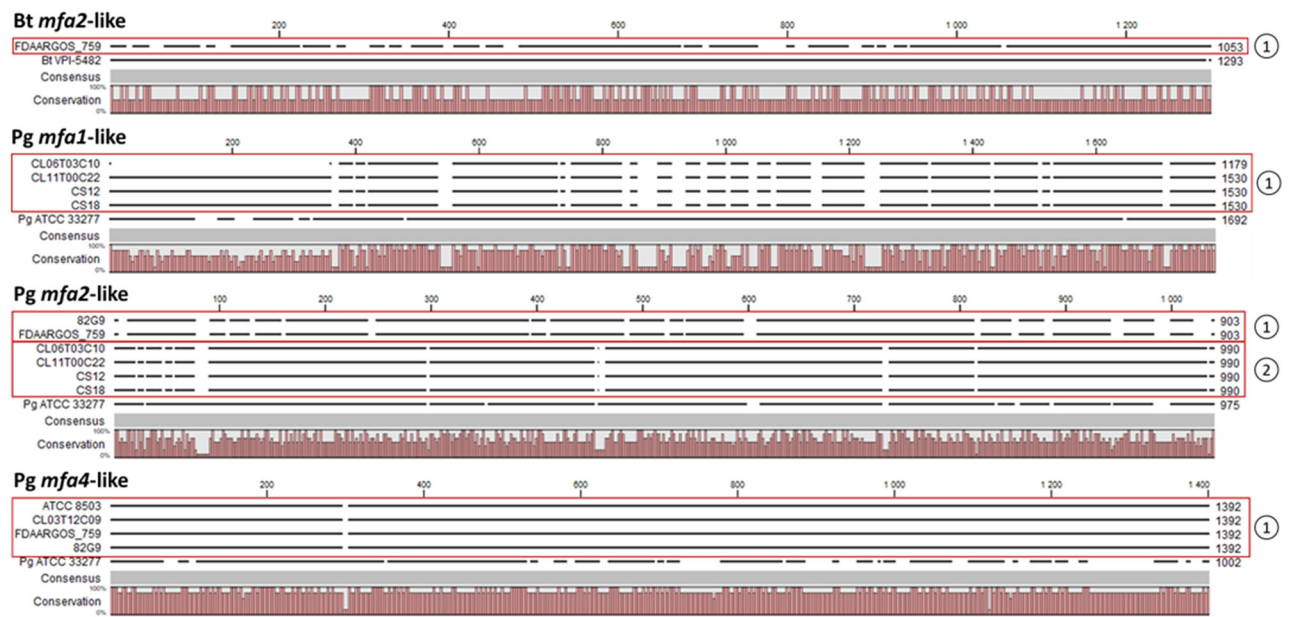

**Figure S1.** Multiple-sequence alignment of *P. distasonis* (A) *uphY*-like, (B) *fim*-like and (C) *mfa*-like genes listed in table 2. Each group of genes sharing similar patterns and sequences has been identified (red frame, 1 and 2) and aligned to generate a consensus sequence. As example, for *uphY*-like genes, two sequences have been generated: *uphY*-like 1 and *uphY*-like 2.
