# Supplementary material for: In Silico Study of Cell Surface Structures of Parabacteroides distasonis Involved in Its Maintenance within the Gut Microbiota
Source: Int J Mol Sci. 2022 Aug 20;23(16):9411. doi: 10.3390/ijms23169411 (PMC9409006; doi:10.3390/ijms23169411)
Supplement: Supplementary file 1 [file ijms-23-09411-s001.zip › Supplementary data_Table S1 and S2.xlsx]

## Sheet: CPS genes
Table S1. Identification of CPS loci in 26 P. distasonis genomes. Colour code: presence (green), partial presence (orange) or absence (red) of the CPS locus by comparison with ATCC 8503T CPS loci. Partial clusters include loci either possessing similar genes compared to ATCC 8503T loci but no upxY-like or an identic upxY-like to ATCC 8503T but a different gene locus.
		P. distasonis
		ATTC 8503T	APCS2/PD	CavFT-hAR46	CBBP-1	CL03T12C09	CL06T03C10	CL09T03C24	CL11T00C22	FDAARGOS_1234	FDAARGOS_615	FDAARGOS_759	NBRC 113806	82G9	CS1	CS2	CS4	CS5	CS6	CS7	CS8	CS12	CS13	CS15	CS17	CS18	CS20
Capsular polysaccharide loci	1	BDI_0015	FQN59_13885			AGZM01_v1_20031		AGZM01_v1_210030	INE94_01726	I6J64_08185	FOB23_12755	FIU22_01625	DN0286_00120	E0E49_RS00075	PDI_v1_140105	PDI_v1_140109	PDI_v1_320028	PDI_v1_140028	PDI_v1_170031	PDI_v1_130113	PDI_v1_150106		PDI_v1_270029	PDI_v1_340019	PDI_v1_130104		PDI_v1_190032
	2	BDI_0121	FQN59_22820	FE931_03495	HHO38_06215	AGZM01_v1_20141	INE86_02217	AGZN01_v1_220001	INE94_01618	I6J64_07660	FOB23_13270	FIU22_02135	DN0286_01160	E0E49_RS00610	PDI_v1_410001	PDI_v1_640002	PDI_v1_30001		PDI_v1_20257	PDI_v1_50203	PDI_v1_260017		PDI_v1_40236	PDI_v1_690004	PDI_v1_680004	PDI_v1_300001	PDI_v1_160136
	3	BDI_0297	FQN59_15425	FE931_04565	HHO38_08850	AGZM01_v1_220221	INE86_01834	AGZN01_v1_240047	INE94_04221	I6J64_06745	FOB23_14215	FIU22_03135	DN0286_02930	E0E49_RS01535	PDI_v1_100101	PDI_v1_90078	PDI_v1_110024	PDI_v1_40094	PDI_v1_120082	PDI_v1_140043	PDI_v1_60104	PDI_v1_170007	PDI_v1_90081	PDI_v1_110071	PDI_v1_80081	PDI_v1_120073	PDI_v1_110076
	4	BDI_0421	FQN59_18075	FE931_12630	HHO38_00825	AGZM01_v1_30060	INE86_03571	AGZN01_v1_180073	INE94_04119	I6J64_06125	FOB23_00450	FIU22_11035	DN0286_20630	E0E49_RS09930	PDI_v1_90143	PDI_v1_310035	PDI_v1_80052	PDI_v1_60067	PDI_v1_90135	PDI_v1_100057	PDI_v1_90141		PDI_v1_150049	PDI_v1_70058	PDI_v1_100141	PDI_v1_100069	PDI_v1_70204
	5	BDI_0548	FQN59_18665	FE931_12050	HHO38_01470	AGZM01_v1_50053	INE86_01659	AGZN01_v1_40007	INE94_01321	I6J64_05495	FOB23_16890	FIU22_10175	DN0286_11670	E0E49_RS09260	PDI_v1_10580	PDI_v1_30136	PDI_v1_720001	PDI_v1_410001	PDI_v1_90002		PDI_v1_250001	PDI_v1_30292	PDI_v1_30217	PDI_v1_10249	PDI_v1_760001		PDI_v1_390001
	6	BDI_1358	FQN59_19985	FE931_10770	HHO38_02790	AGZM01_v1_70001	INE86_02996	AGZN01_v1_430284	INE94_01070	I6J64_01335	FOB23_19395	FIU22_08885	DN0286_16450	E0E49_RS07755	PDI_v1_10001	PDI_v1_20230	PDI_v1_50002	PDI_v1_10325	PDI_v1_340039	PDI_v1_160002	PDI_v1_40338	PDI_v1_20249/450001	PDI_v1_560009	PDI_v1_230001	PDI_v1_10344	PDI_v1_10788	PDI_v1_240021
	7	BDI_1420	FQN59_19645	FE931_11100	HHO38_09735	AGZM01_v1_60002	INE86_03062	AGZN01_v1_430205	INE94_01135	I6J64_01020	FOB23_19765	FIU22_09285	DN0286_17070	E0E49_RS08085	PDI_v1_180001	PDI_v1_250068	PDI_v1_350002	PDI_v1_280070	PDI_v1_210116	PDI_v1_450001	PDI_v1_210071	PDI_v1_130108	PDI_v1_710001	PDI_v1_290069	PDI_v1_10272	PDI_v1_70016	PDI_v1_170032
	8	BDI_1599	FQN59_01450	FE931_06515	HHO38_07395	AGZM01_v1_90099/80322	INE86_03250	AGZN01_v1_70006	INE94_00163	I6J64_00120	FOB23_21075/15675	FIU22_04510	DN0286_06460/19290	E0E49_RS03490	PDI_v1_290003	PDI_v1_650004	PDI_v1_430001	PDI_v1_380027	PDI_v1_440003	PDI_v1_70006	PDI_v1_240001	PDI_v1_50001	PDI_v1_680003	PDI_v1_660002	PDI_v1_400005	PDI_v1_290001	PDI_v1_90230
	9	BDI_1847	FQN59_17355	FE931_13310	HHO38_00195	AGZM01_v1_10603	INE86_03708	AGZN01_v1_170068	INE94_04008	I6J64_18870	FOB23_01030	FIU22_11660	DN0286_21740	E0E49_RS10660	PDI_v1_40256	PDI_v1_260065	PDI_v1_290001	PDI_v1_270030	PDI_v1_10005	PDI_v1_220060	PDI_v1_20396	PDI_v1_120132	PDI_v1_290005	PDI_v1_310003	PDI_v1_90002	PDI_v1_20664	PDI_v1_50079
	10	BDI_2200		FE931_04115					INE94_00400	I6J64_17165												PDI_v1_160061
	11	BDI_2226						AGZN01_v1_50002	INE94_01848	I6J64_17040							PDI_v1_220060			PDI_v1_80125		PDI_v1_160022	PDI_v1_50085/160118/20275		PDI_v1_20259	PDI_v1_110003	PDI_v1_70041
	12	BDI_3243		FE931_04210				AGZN01_v1_510002	INE94_00428	I6J64_11960											PDI_v1_140053	PDI_v1_20210	PDI_v1_340005				PDI_v1_160045
	13	BDI_3610	FQN59_11380	FE931_01305	HHO38_19645	AGZM01_v1_140253	INE86_01274	AGZN01_v1_390030	INE94_02266	I6J64_10120	FOB23_10755	FIU22_19965	DN0286_38720	E0E49_RS20720	PDI_v1_150032	PDI_v1_170062	PDI_v1_10055	PDI_v1_20032	PDI_v1_70007	PDI_v1_10273	PDI_v1_200055	PDI_v1_10455	PDI_v1_70181	PDI_v1_90057	PDI_v1_20560	PDI_v1_140070	PDI_v1_10638
	14	BDI_3814	FQN59_12385	FE931_02335	HHO38_12225	AGZM01_v1_130104	INE86_01474	AGZN01_v1_450001	INE94_02070	I6J64_09060	FOB23_11755	FIU22_00540	DN0286_40610	E0E49_RS21770	PDI_v1_60097	PDI_v1_80132	PDI_v1_240069	PDI_v1_20243	PDI_v1_30064	PDI_v1_10069	PDI_v1_110039	PDI_v1_70178	PDI_v1_210055	PDI_v1_60032	PDI_v1_60178	PDI_v1_80165	PDI_v1_120086

## Sheet: rfbA genes
Table S2. rfbA copy number and classification of each P. distasonis strain. Colour code: presence (green) or absence (red) of the rfbA gene of the indicated type.
		P. distasonis
		ATTC 8503T	APCS2/PD	CavFT-hAR46	CBBP-1	CL03T12C09	CL06T03C10	CL09T03C24	CL11T00C22	FDAARGOS_1234	FDAARGOS_615	FDAARGOS_759	NBRC 113806	82G9	CS1	CS2	CS4	CS5	CS6	CS7	CS8	CS12	CS13	CS15	CS17	CS18	CS20
	rfbA copy nb	1	1	1	3	1	2	3	1	1	3	1	2	2	2	2	1	1	3	1	1	2	4	2	2	1	1
rfbA-Type	rfbA-Type 1	BDI_0650	FQN59_00935	FE931_07025	HHO38_06945	AGZM01_v1_80504	INE86_02314	AGZN01_v1_180088	INE94_00323	I6J64_04985	FOB23_16170	FIU22_04975	DN0286_07410	E0E49_RS04005	PDI_v1_10862	PDI_v1_400025	PDI_v1_30145	PDI_v1_50113	PDI_v1_20113	PDI_v1_80002	PDI_v1_10138	PDI_v1_50109	PDI_v1_40095	PDI_v1_70074	PDI_v1_30101	PDI_v1_10083	PDI_v1_90122
	rfbA-Type 2							AGZN01_v1_50105			FOB23_15745			E0E49_RS03555	PDI_v1_10966				PDI_v1_260007			PDI_v1_50013	PDI_v1_40005		PDI_v1_30006
	rfbA-Type 3				HHO38_00900			AGZN01_v1_60062			FOB23_00375		DN0286_20480			PDI_v1_310020			PDI_v1_90120				PDI_v1_150064	PDI_v1_150106
	rfbA-Type 4				HHO38_19695		INE86_01284
	rfbA-Type 5																						PDI_v1_340013
